# Supplementary material
Source: Springer Nature journal article supplement (https://www.springermedizin.de/resource/supplementary/12885_2011_2920_MOESM3_ESM.pdf/9462302)
Supplement: MOESM3 [file 9462302]

Samples obtained from 1589 subjects

**Exclusion: 348**

- IBD or ulcerative colitis (84)
- radiation proctitis (4)
- colostomy (8)
- extended hemicolectomy (1)
- error in FIT sampling (251)

Colonoscopy (1241)

**Incomplete colon evaluation: 118**

- insufficient bowel cleaning<sup>1</sup> (53)
- incomplete colonoscopy<sup>1</sup> (65)

Complete colonoscopy (1123)

**No histology obtained: 27**

Included for analysis: 1096
